# Supplementary material for: High resolution spectroscopy reveals fibrillation inhibition pathways of insulin
Source: PubMed Central journal article supplement (PMC5180225; doi:10.1038/srep39622), 2016-12-23
Supplement: srep39622-s1.pdf [file srep39622-s1.pdf]

# High resolution spectroscopy reveals fibrillation inhibition pathways

T. Deckert-Gaudig, V. Deckert

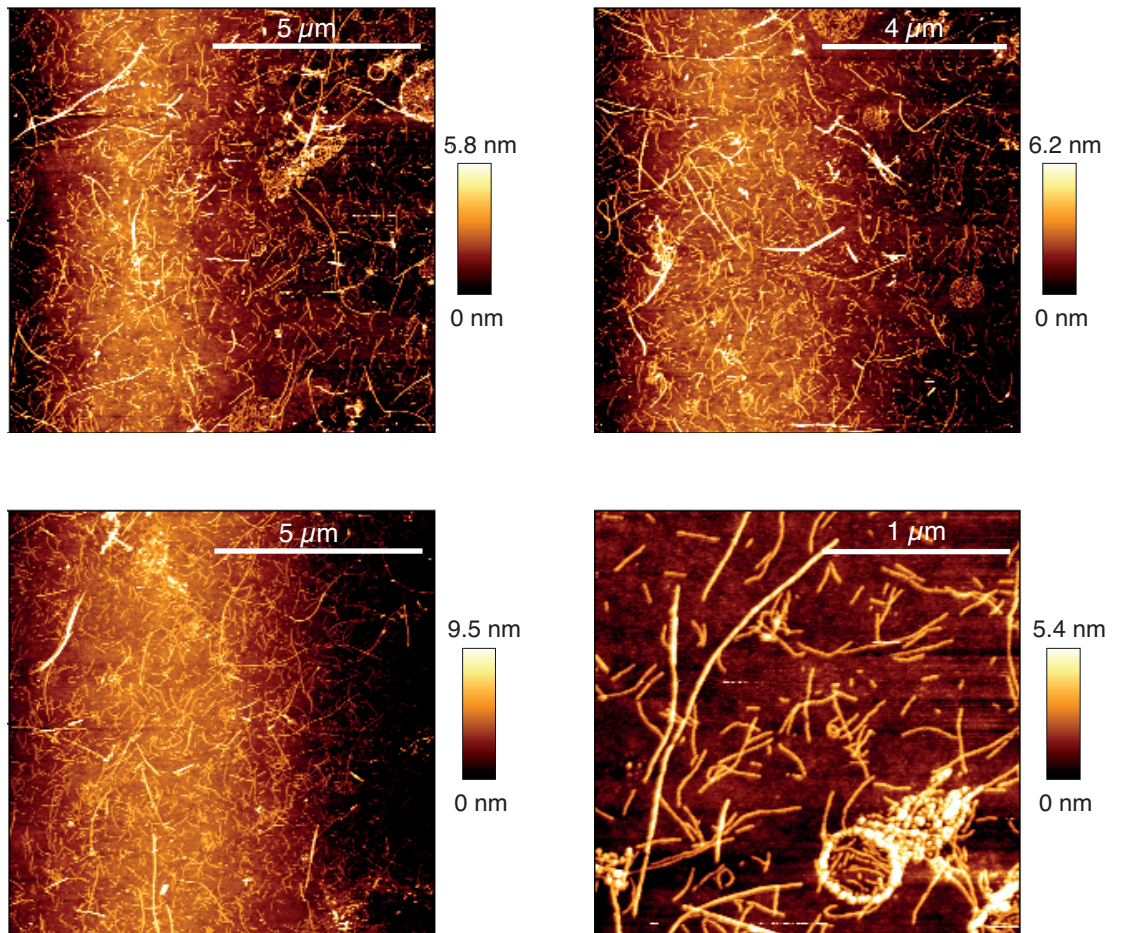

**Supplementary Figure S1.** Four AFM topography images (of 5 areas) of insulin fibrils grown at pH 2.5 for 2.5 h in the presence of PhCN ( $C_{\text{PhCN}} : C_{\text{insulin}} 1:1$ ).

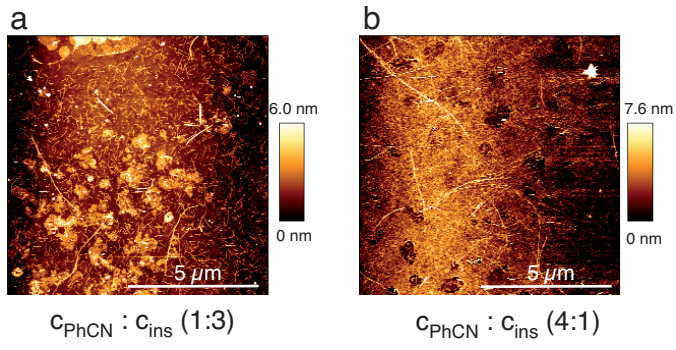

**Supplementary Figure S2.** (a) AFM topography of insulin fibrillized at pH 2.5 at 70 °C for 2.5 h generated using PhCN ( $C_{\text{PhCN}} : C_{\text{insulin}} 1:3$ ) and (b) using PhCN ( $C_{\text{PhCN}} : C_{\text{insulin}} 4:1$ ).

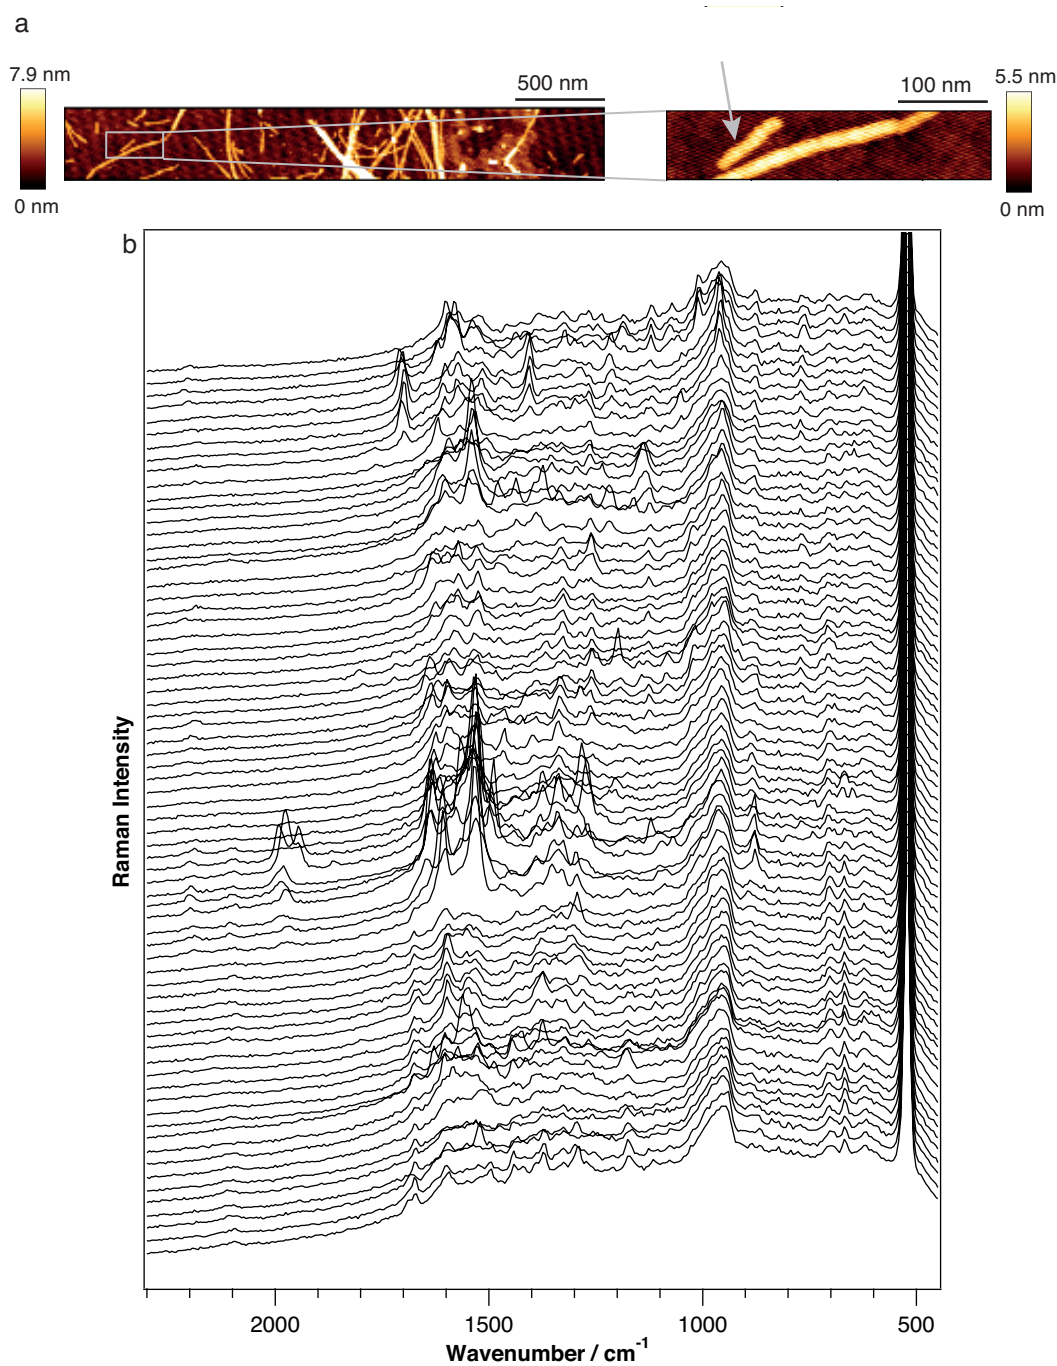

**Supplementary Figure S3.** (a) AFM topography of insulin fibrillized at pH 2.5 at 70 °C for 2.5 h generated using PhCN ( $c_{\text{PhCN}} : c_{\text{insulin}} 1:1$ ). The selected fibril where TERS spectra were collected consecutively is marked with an arrow in the zoomed image. (b) Complete dataset of TERS measurement along the main axis of a fibril shown in (a) and **Fig. 3d** in the manuscript. Spectra were consecutively acquired with a step-size of 1 nm along the fibril main axis ( $t_{\text{acq}} = 5\text{s}$ ).

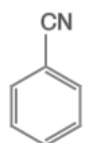

PhCN

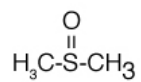

DMSO

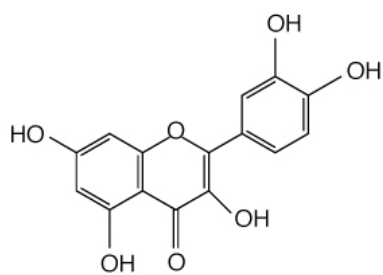

Que

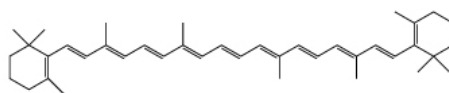

$\beta$ -carotene

**Supplementary Figure S4.** Molecular structures of benzonitrile (PhCN),  $\beta$ -carotene, quercetin (Que) and DMSO.



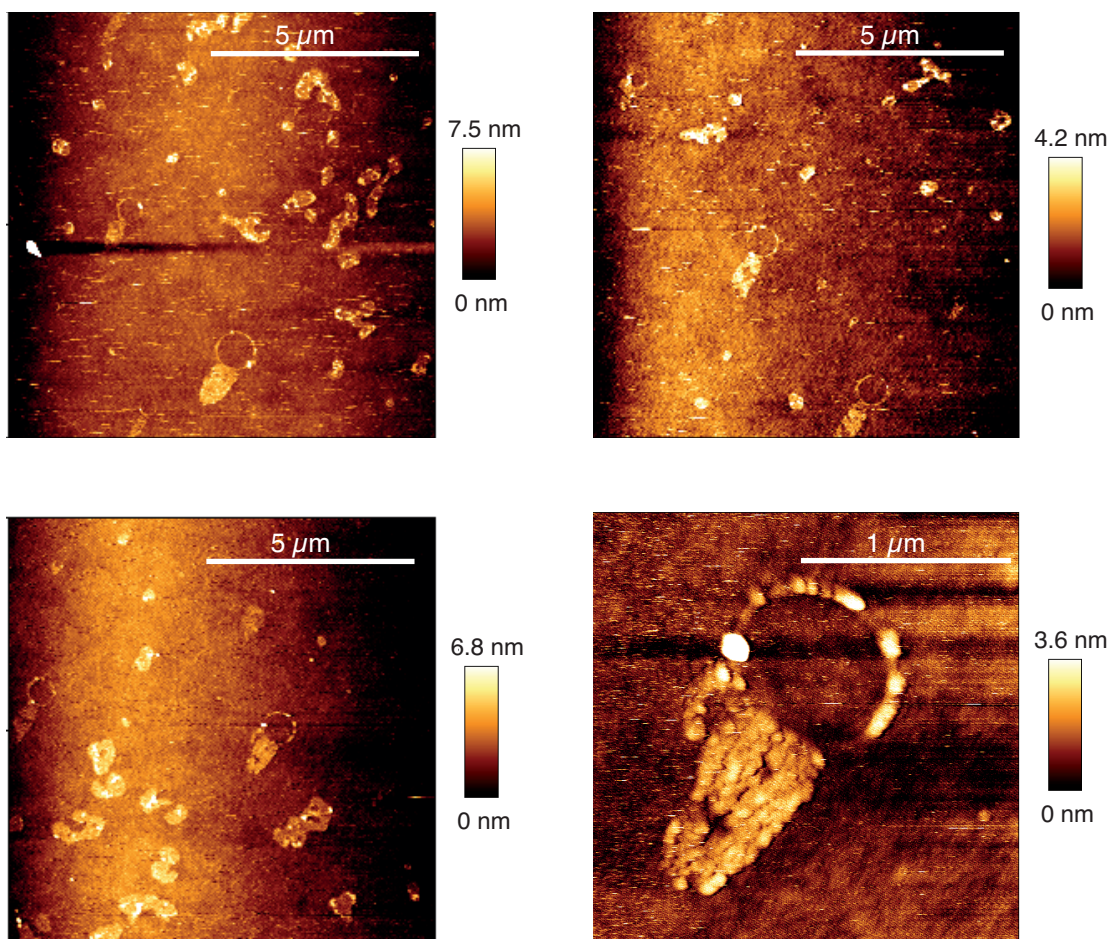

**Supplementary Figure S5.** Four AFM topography images (of 5 areas) of insulin fibrils grown at pH 2.5 for 2.5 h in the presence of Que ( $c_{\text{Que}} : c_{\text{insulin}} 1:1$ ).

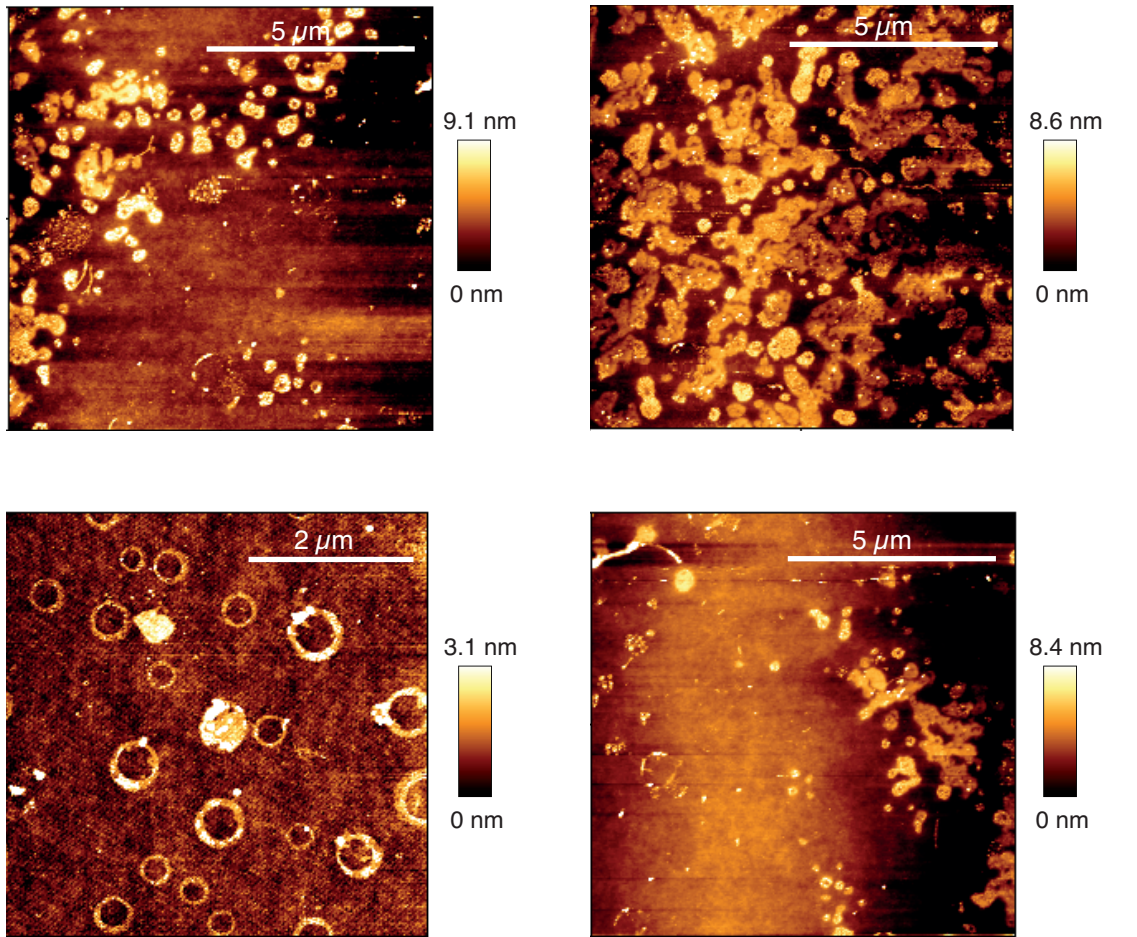

**Supplementary Figure S6.** Four AFM topography images (of 5 areas) of insulin fibrils grown at pH 2.5 for 2.5 h in the presence of  $\beta$ -carotene ( $C_{\beta\text{-carotene}} : C_{\text{insulin}} 1:1$ ).

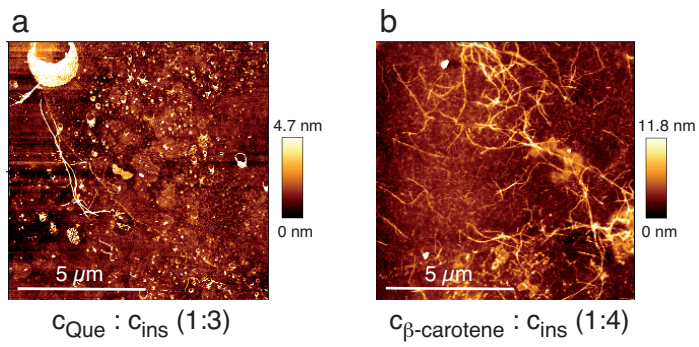

**Supplementary Figure S7.** (a) AFM topography of aggregates generated via insulin fibrillation in the presence of Que ( $C_{\text{Que}} : C_{\text{insulin}} 1:3$ ); (b) AFM topography of aggregates generated via insulin fibrillation in the presence of  $\beta$ -carotene ( $C_{\beta\text{-carotene}} : C_{\text{insulin}} 1:4$ )

Insulin fibrillation in  
presence of  $x \mu\text{L}$  of DMSO

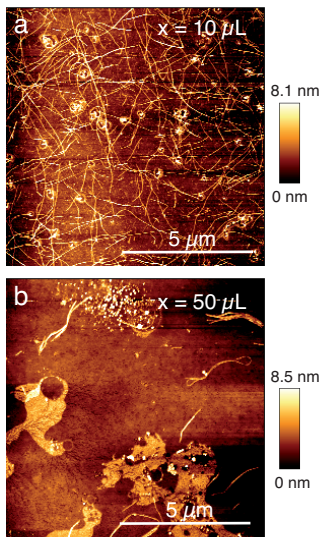

Re-fibrillation of aggregates  
after removal of  $100 \mu\text{L}$  of DMSO

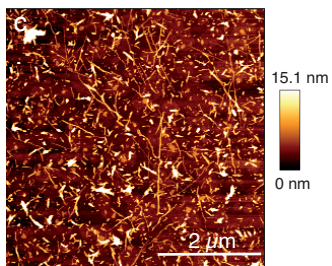

**Supplementary Figure S8.** (a) AFM topography of species formed via insulin fibrillation in the presence of  $10 \mu\text{L}$  of DMSO and  $50 \mu\text{L}$  of DMSO (b). (c) AFM topography of insulin fibrils generated by a subsequent fibrillation after removal of  $100 \mu\text{L}$  of DMSO from the sample shown in **Fig. 4e** in the manuscript.



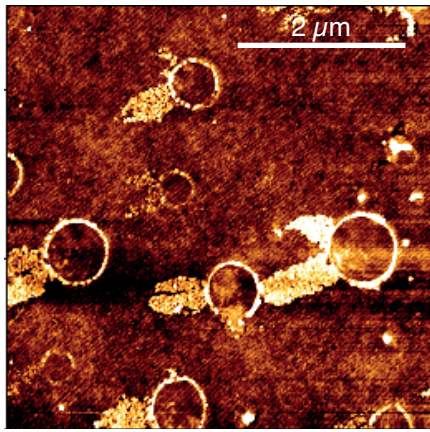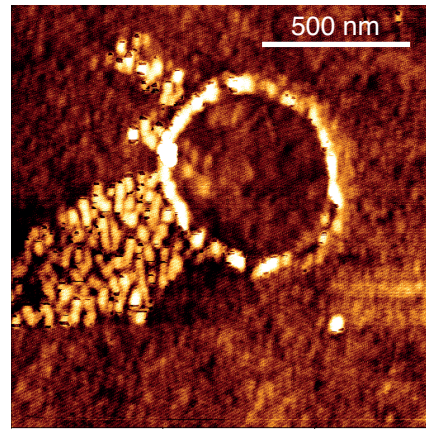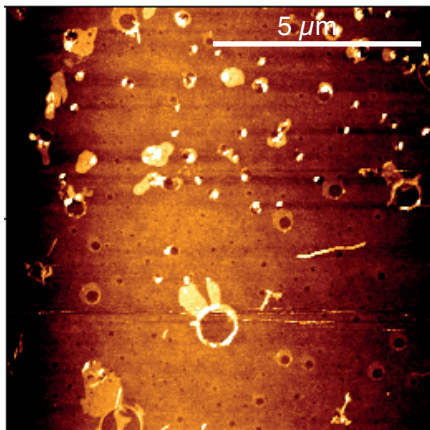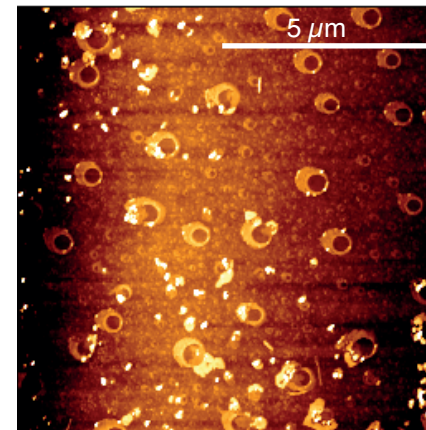

**Supplementary Figure S9.** Four AFM topography images (of 5 areas) of insulin fibrils grown at pH 2.5 for 2.5 h in the presence of 100 μL of pure DMSO.

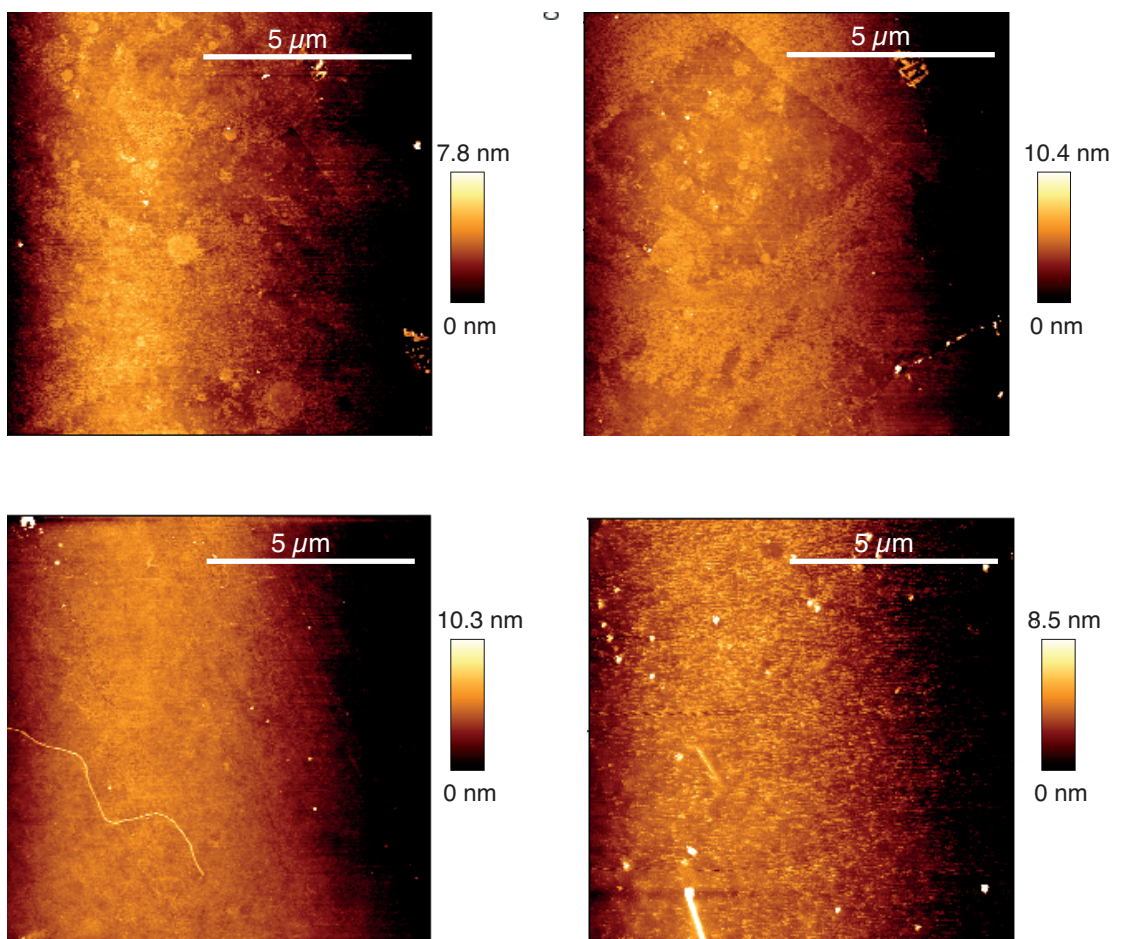

**Supplementary Figure S10.** Four AFM topography images (of 5 areas) of insulin fibrils grown at pH 2.5 for 2.5 h in the presence of 154 μL of pure DMSO.

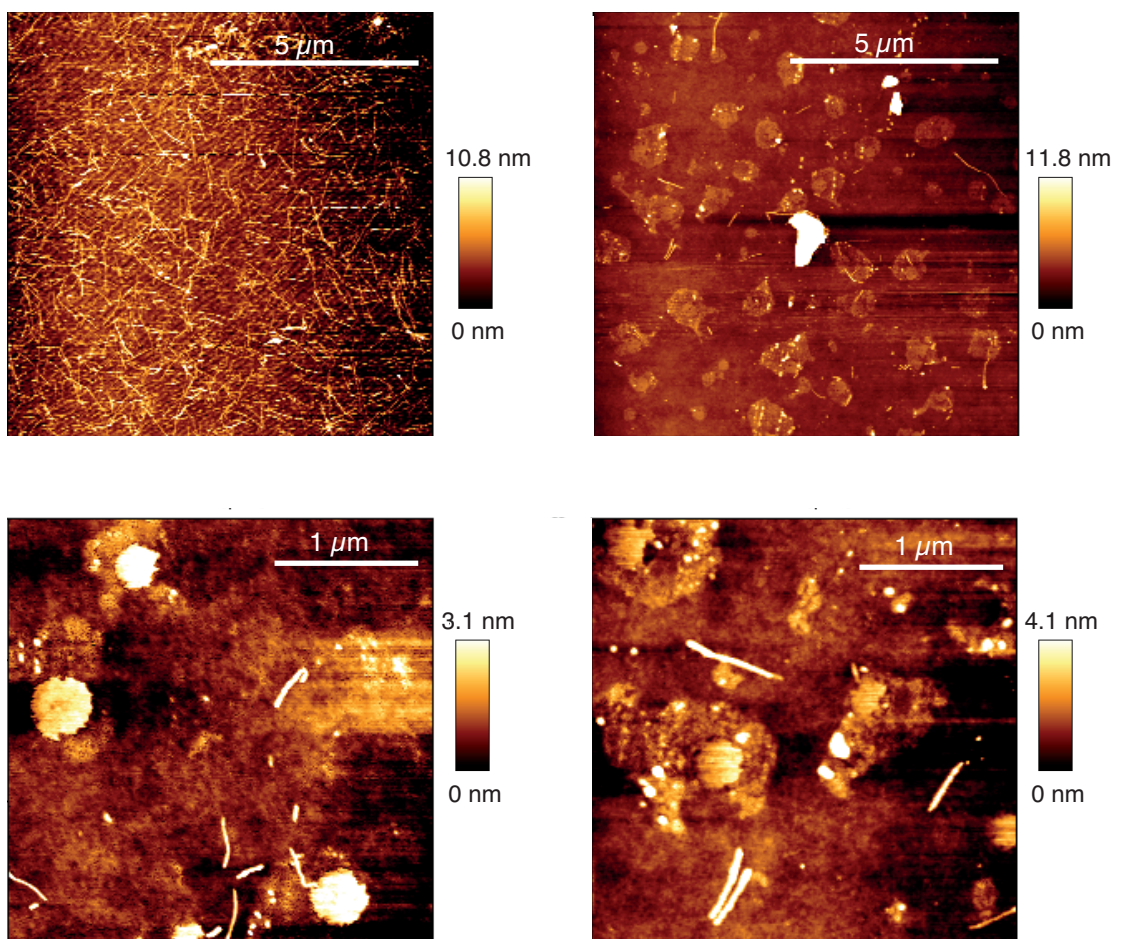

**Supplementary Figure S11.** Four AFM topography images (of 5 area) of aggregates obtained from pH 2.5 insulin fibril dissection in the presence of Que ( $C_{\text{Que}} : C_{\text{fib}} 1:1$ ).



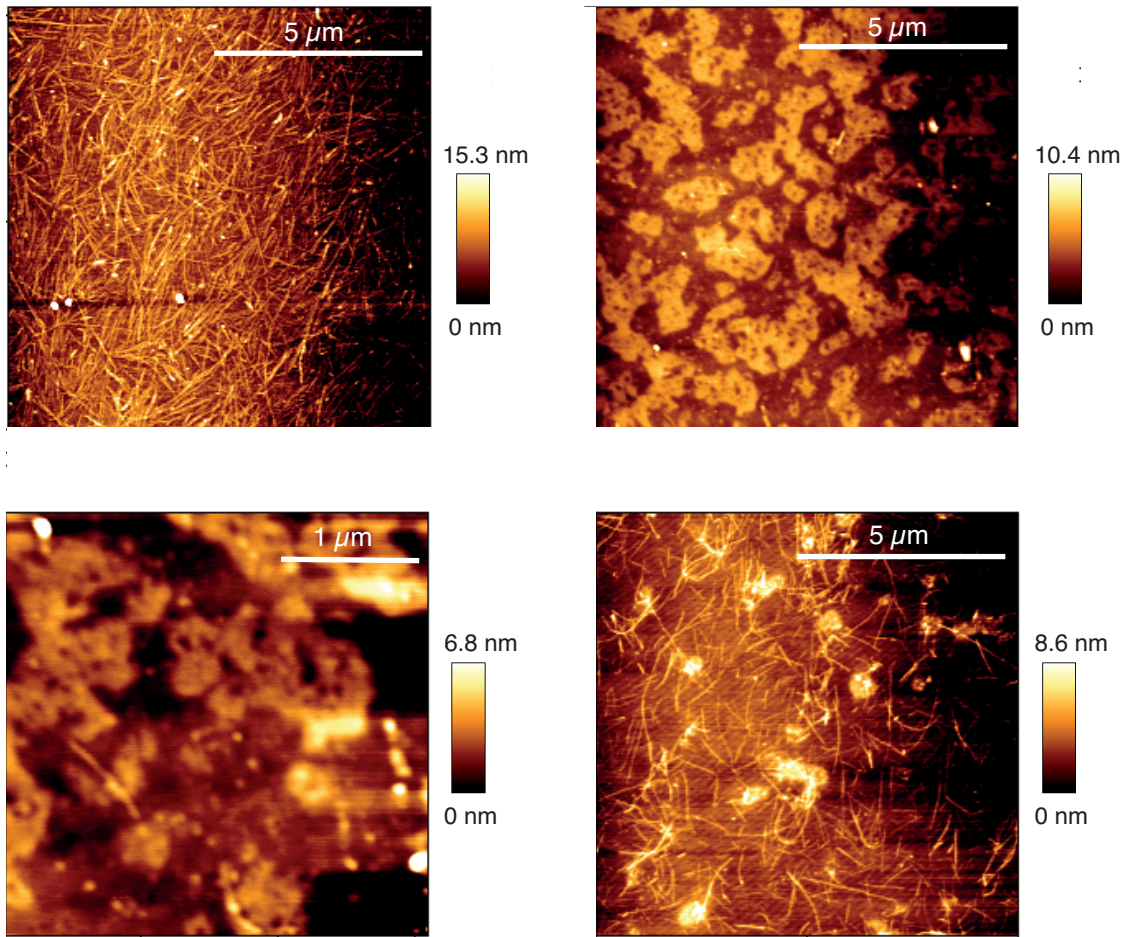

**Supplementary Figure S12.** Four AFM topography images (of 5 area) of aggregates obtained from pH 2.5 insulin fibril dissection in the presence of  $\beta$ -carotene ( $c_{\beta\text{-carotene}} : c_{\text{fib}} 1:1$ )

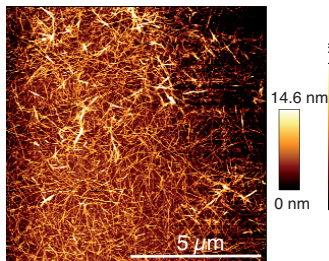

**Supplementary Figure S13.** AFM topography of insulin fibrils treated for 5 h with 154  $\mu\text{L}$  of DMSO.
